# Supplementary material for: Transforming organic molecular films into carbon films as solid lubricants
Source: Royal Society of Chemistry journal article supplement (doi:10.1039/c5ra01400j), 2015-01-01
Supplement: c5ra01400j1.pdf [file c5ra01400j1.pdf]

## Transforming Organic Molecular Film into Carbon Film as Solid Lubricant

Hongyu Liang,<sup>a,b</sup> Yongfeng Bu,<sup>c</sup> Yan Zhou,<sup>a</sup> Yongfu Wang,<sup>a</sup> and Junyan Zhang<sup>a,\*</sup>

<sup>a</sup>State Key Laboratory of Solid Lubrication, Lanzhou Institute of Chemical Physics, Chinese Academy of Sciences, Lanzhou 730000, China

<sup>b</sup>University of Chinese Academy of Sciences, Beijing 100049, China

<sup>c</sup>Key Laboratory of Mesoscopic Chemistry of MOE and Jiangsu Provincial Lab for Nanotechnology, School of Chemistry and Chemical Engineering, Nanjing University, Nanjing 210093, China

\* E-mail: zhangjunyan@licp.cas.cn    Tel./fax: +86 9314968295

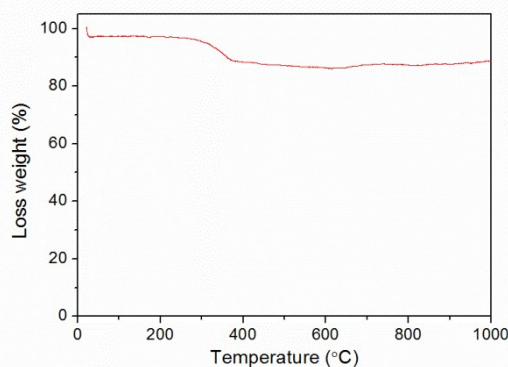

**Figure S1** TG curve of TCA molecular film deposited at 30V (TCAF30-u).

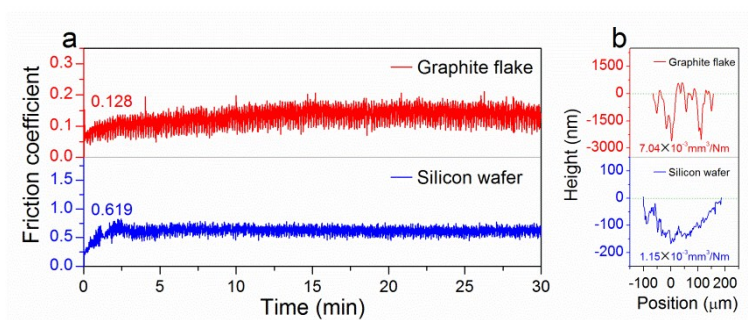

**Figure S2** (a) Friction coefficient vs. time curves and (b) 2D profile plots of wear tracks for graphite flake and bare silicon wafer, respectively. Conditions for friction experiments: load = 20 mN, sliding velocity = 0.01 m/s.
